# Supplementary material for: Influence of Light Conditions on the Antibacterial Performance and Mechanism of Waterborne Fluorescent Coatings Based on Waterproof Long Afterglow Phosphors/PDMS Composites
Source: MDPI journal article supplement (doi:10.3390/polym15193873), 2023-09-24
Supplement: s1 [file s1]

# Supplementary Materials: Influence of light conditions on the antibacterial performance and mechanism of waterborne fluorescent coatings based on waterproof long afterglow phosphors/PDMS composites

Sinan Hao, Yuhong Qi, Zhanping Zhang

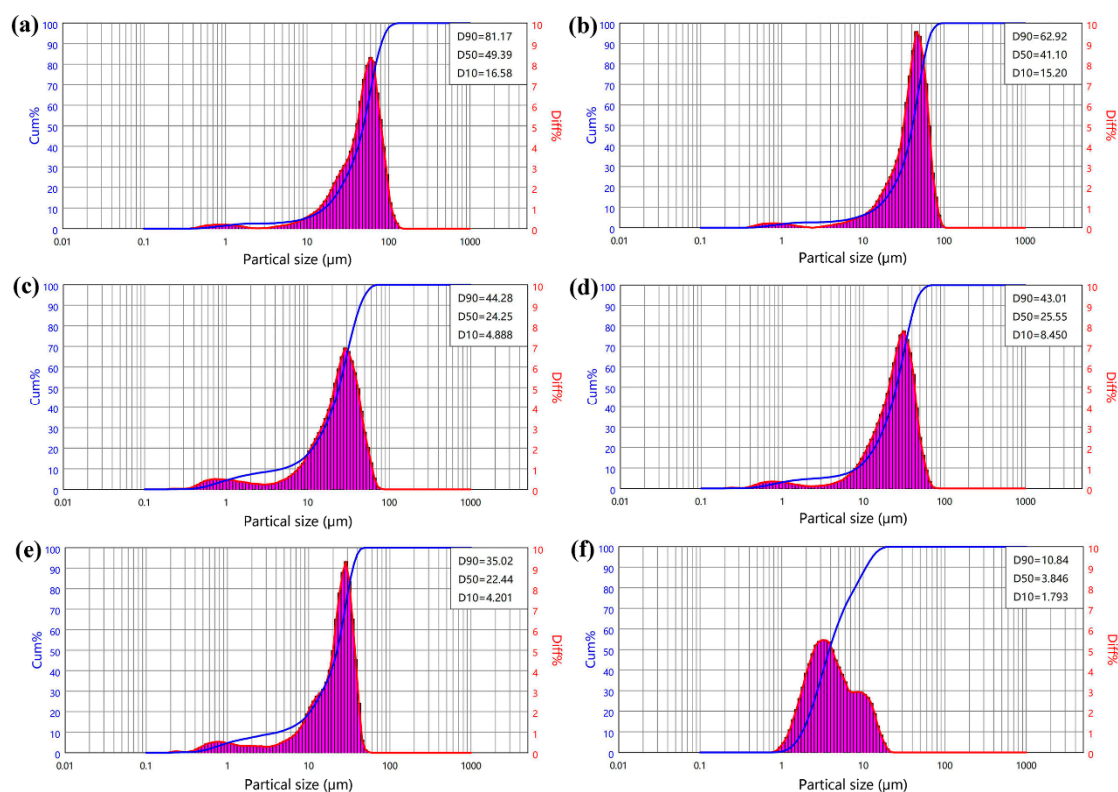

**Figure S1.** Particle average and size distribution of (a) P-SB, (b) P-BG, (c) P-OR, (d) P-YG, (e) P-LY, and (f) HT-SOE.

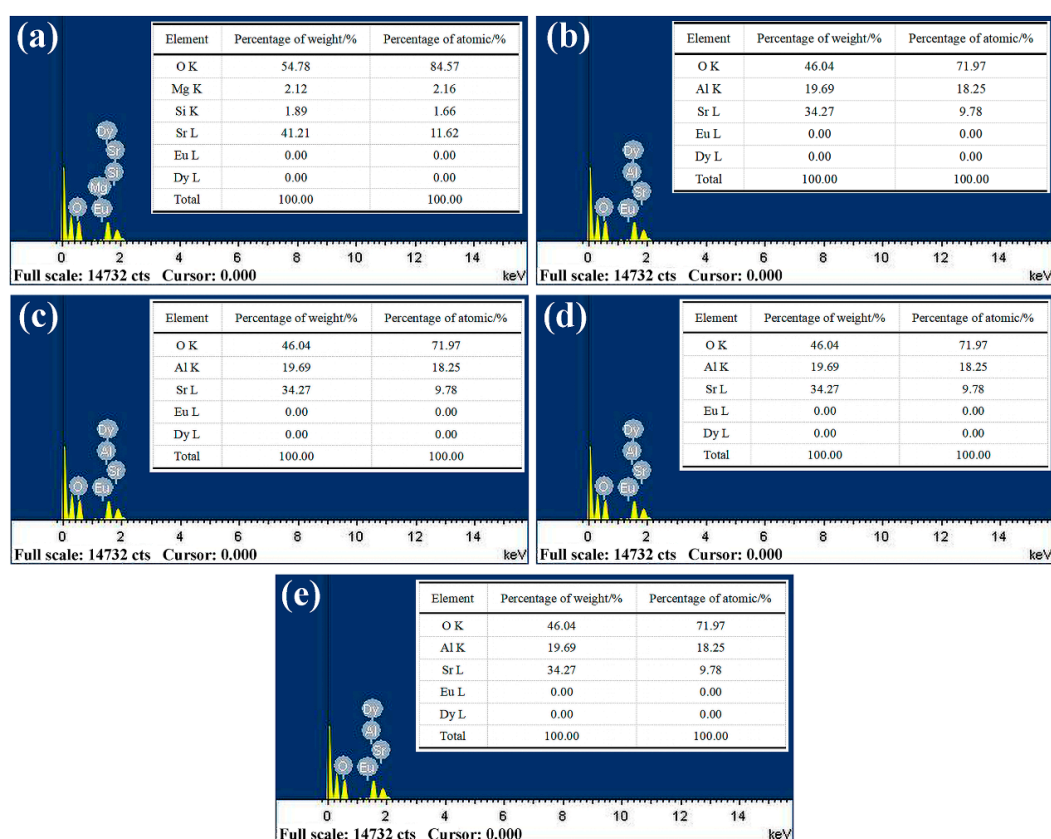

Figure S2. EDS mapping of (a) P-SB, (b) P-BG, (c) P-OR, (d) P-YG, and (e) P-LY.

Table S1. Polarity force  $\gamma_L^p$ , dispersion force  $\gamma_L^d$ , surface tension  $\gamma_L$ , and polarity of water and diiodomethane.

| Liquid        | $\gamma_L^p$ / $\text{mJ}\cdot\text{m}^{-1}$ | $\gamma_L^d$ / $\text{mJ}\cdot\text{m}^{-1}$ | $\gamma_L$ / $\text{mJ}\cdot\text{m}^{-1}$ | Polarity |
|---------------|----------------------------------------------|----------------------------------------------|--------------------------------------------|----------|
| Water         | 51                                           | 21.8                                         | 72.8                                       | Polarity |
| Diiodomethane | 2.3                                          | 48.5                                         | 50.8                                       | Nonpolar |

Table S2. Volumetric average particle size and areal average particle size of WLAP and HT-SOE.

| Sample | Volumetric average particle size<br>(D[4,3]) / $\mu\text{m}$ | Areal average particle size<br>(D[3,2]) / $\mu\text{m}$ |
|--------|--------------------------------------------------------------|---------------------------------------------------------|
| P-SB   | $48.66 \pm 0.65$                                             | $17.15 \pm 0.12$                                        |
| P-BG   | $38.85 \pm 0.62$                                             | $14.26 \pm 0.50$                                        |
| P-OR   | $24.80 \pm 0.17$                                             | $6.68 \pm 0.06$                                         |
| P-YG   | $24.11 \pm 0.81$                                             | $8.56 \pm 0.19$                                         |
| P-LY   | $21.48 \pm 0.49$                                             | $6.39 \pm 0.18$                                         |
| HT-SOE | $5.24 \pm 0.08$                                              | $3.50 \pm 0.16$                                         |

Table S3. Water contact angle (WCA), diiodomethane contact angle (DCA), polarity force  $\gamma_s^p$ , dispersion force  $\gamma_s^d$ , and surface free energy (SFE) of coatings.

| Sample    | WCA / $^\circ$   | DCA / $^\circ$   | $\gamma_s^p$ / $\text{mJ}\cdot\text{m}^{-2}$ | $\gamma_s^d$ / $\text{mJ}\cdot\text{m}^{-2}$ | SFE / $\text{mJ}\cdot\text{m}^{-2}$ |
|-----------|------------------|------------------|----------------------------------------------|----------------------------------------------|-------------------------------------|
| C-B/PDMS  | $100.1 \pm 0.86$ | $76.13 \pm 2.58$ | $2.40 \pm 0.65$                              | $17.71 \pm 1.62$                             | $20.11 \pm 1.03$                    |
| C-SB/PDMS | $118.2 \pm 1.67$ | $75.55 \pm 2.26$ | $0.15 \pm 0.04$                              | $12.95 \pm 1.99$                             | $13.10 \pm 1.96$                    |
| C-BG/PDMS | $110.4 \pm 1.09$ | $81.35 \pm 1.11$ | $2.82 \pm 0.26$                              | $14.69 \pm 1.07$                             | $17.51 \pm 0.61$                    |
| C-OR/PDMS | $99.2 \pm 0.71$  | $76.35 \pm 0.98$ | $2.44 \pm 0.17$                              | $17.39 \pm 1.48$                             | $19.83 \pm 0.52$                    |
| C-YG/PDMS | $104.1 \pm 1.44$ | $73.85 \pm 2.79$ | $0.91 \pm 0.09$                              | $19.91 \pm 3.42$                             | $20.83 \pm 1.54$                    |
| C-LY/PDMS | $102.0 \pm 1.51$ | $77.05 \pm 1.44$ | $1.74 \pm 0.22$                              | $17.49 \pm 0.62$                             | $19.22 \pm 0.80$                    |
